# Supplementary material for: Biodegradable alginate–sericin biofilm: a colorimetric indicator using mangosteen-peel anthocyanins for protein food freshness
Source: Royal Society of Chemistry journal article supplement (doi:10.1039/d5fb00753d), 2026-01-01
Supplement: d5fb00753d1.pdf [file d5fb00753d1.pdf]

## **Biodegradable Alginate-Sericin Biofilm: A Colorimetric Indicator Using Mangosteen-Peel Anthocyanins for Protein Food Freshness**

Thi-Hong-No Nguyen<sup>1,2</sup>, Minh-Truong Truong<sup>3</sup>, Minh-Ty Nguyen<sup>1</sup>, Quynh-Nhu Pham<sup>1</sup>, Huy-Khoa Tran<sup>1</sup>, Huy-Khiem Tran<sup>1</sup>, Dinh-Tri Mai<sup>1,2</sup>, Van-Dung Le<sup>1,2</sup>, Chi-Hien Dang<sup>1,2</sup>, Cao-Hien Nguyen<sup>4</sup>, Thanh-Danh Nguyen<sup>1,2\*</sup>

<sup>1</sup>Institute of Advanced Technology, Vietnam Academy of Science and Technology, 01B TL29, An Phu Dong Ward, Ho Chi Minh City, 700000, Vietnam.

<sup>2</sup>Graduate University of Science and Technology, Vietnam Academy of Science and Technology, 18 Hoang Quoc Viet, Cau Giay District, Hanoi, Vietnam.

<sup>3</sup>Ton Duc Thang University, 19 Nguyen Huu Tho, Ho Chi Minh City, Vietnam.

<sup>4</sup>Department of Chemical Technology, Ho Chi Minh City University of Industry and Trade, Ho Chi Minh City 700000, Vietnam.

\*Corresponding email: danh5463bd@yahoo.com

### **Supporting Information**

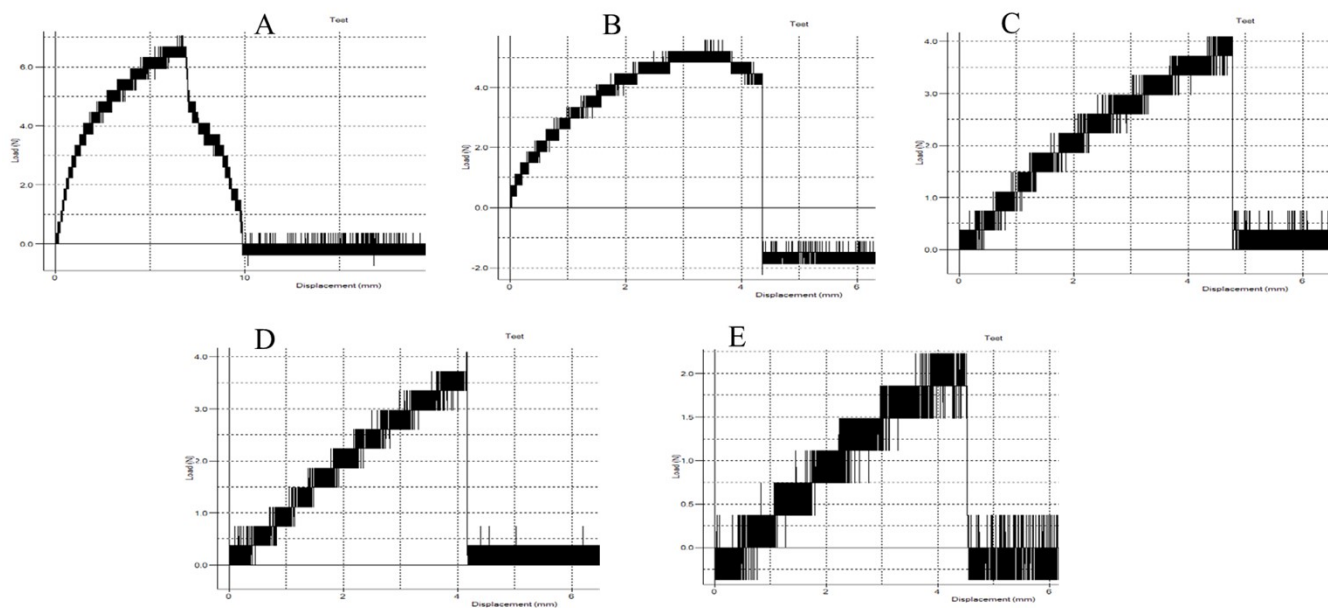

Figure S1. Stress-strain spectra of ASA0 (A), ASA5 (B), ASA7 (C), ASA10 (D) and ASA12 (E)
